# Supplementary material for: Crystal structure and magnetic properties of EuZrO3 solid solutions
Source: Royal Society of Chemistry journal article supplement (doi:10.1039/d3tc00888f), 2023-01-01
Supplement: d3tc00888f1.pdf [file d3tc00888f1.pdf]

Supporting Information

Crystal structure and magnetic properties of  $\text{EuZrO}_3$  solid solutions

Sihui Li, Shinya Konishi, Takuya Kito, Koji Fujita, and Katsuhisa Tanaka

Department of Material Chemistry, Graduate School of Engineering, Kyoto University, Nishikyo-ku,  
Kyoto 615-8510, Japan

X-ray diffraction profiles

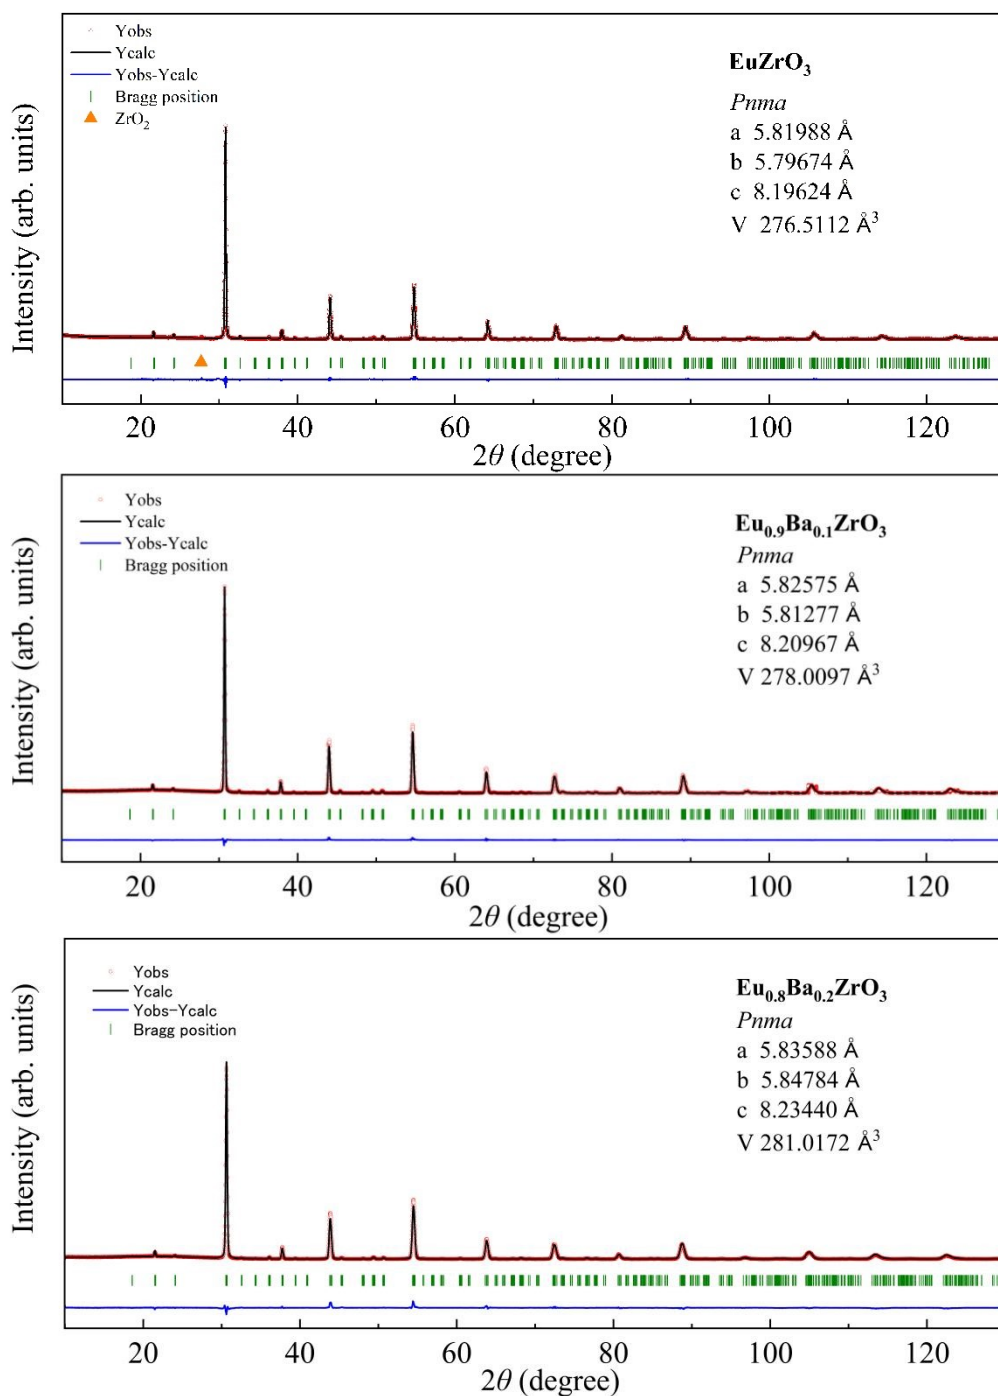

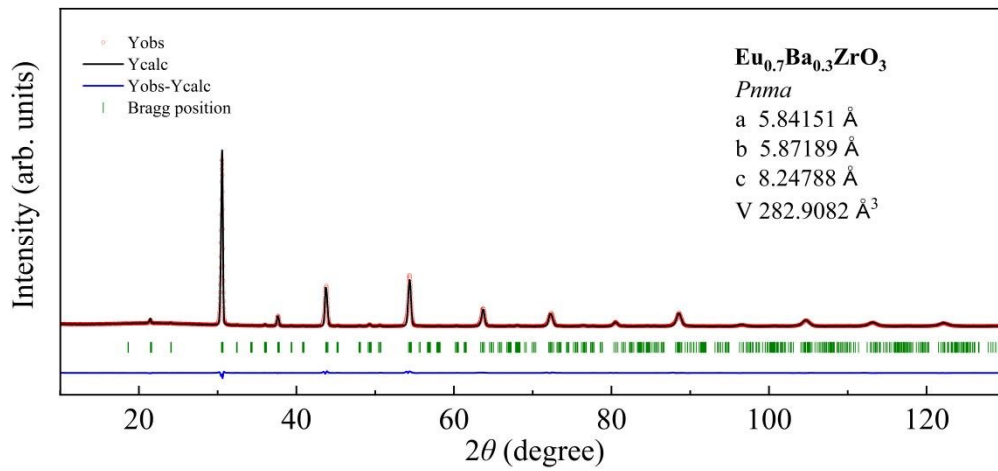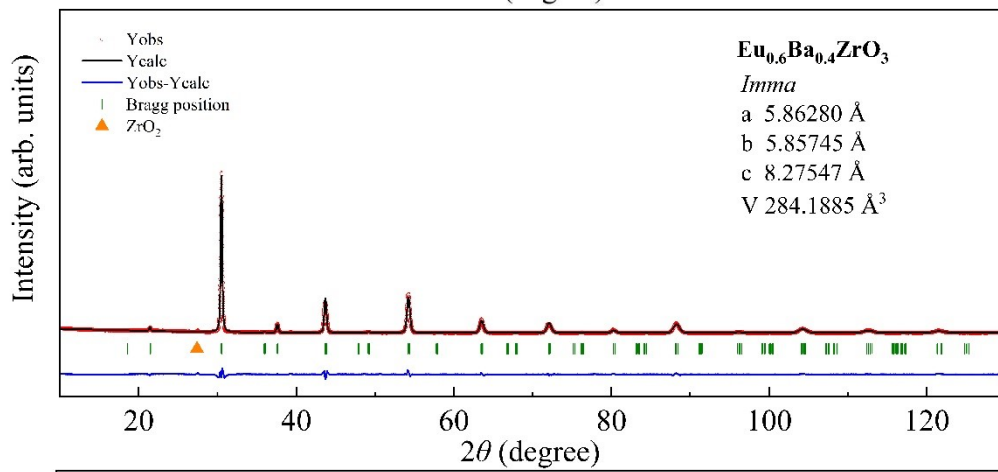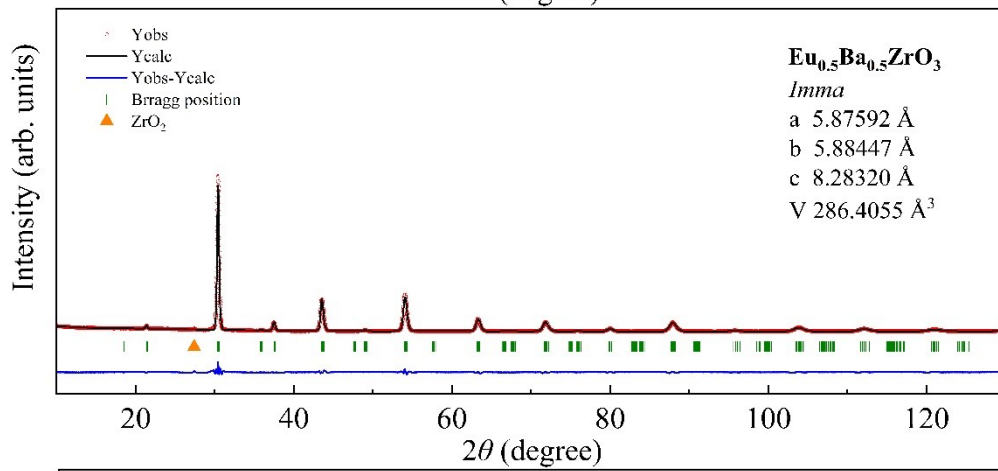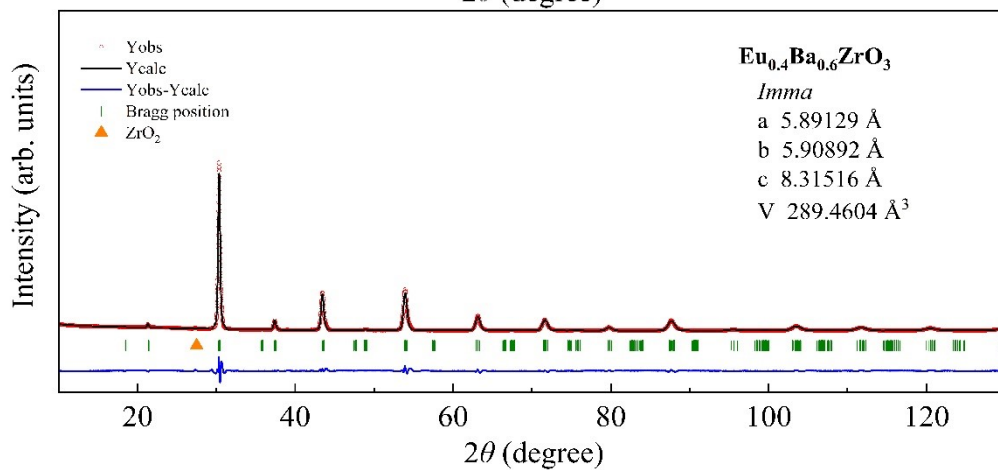

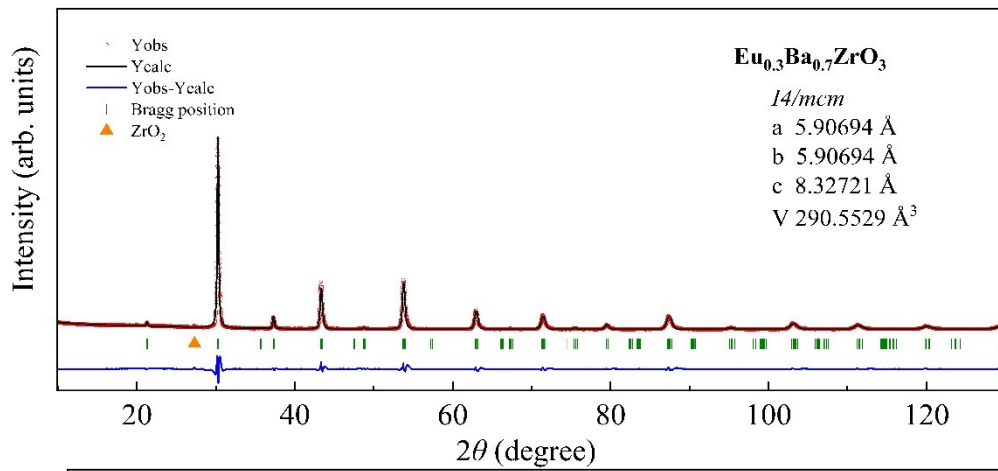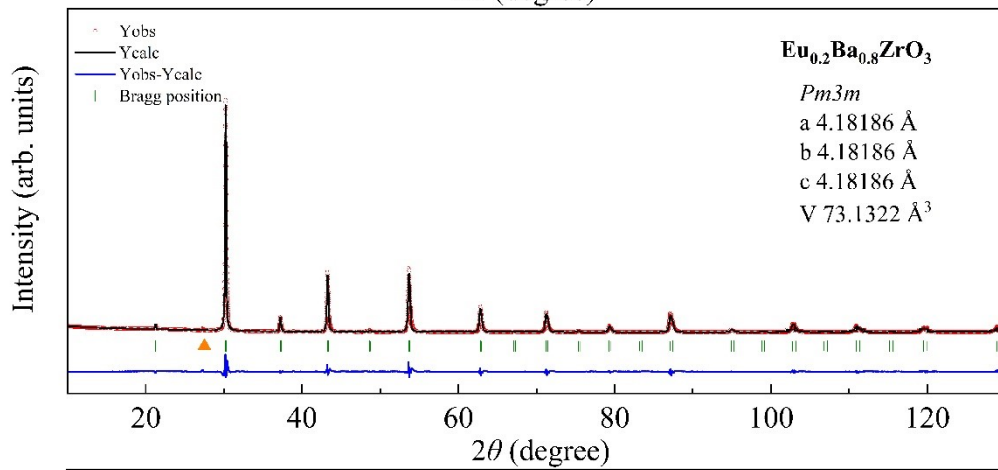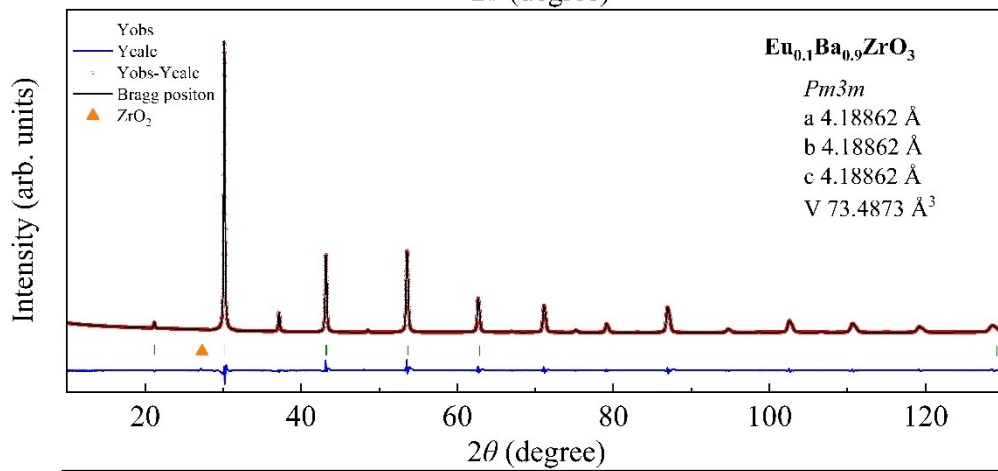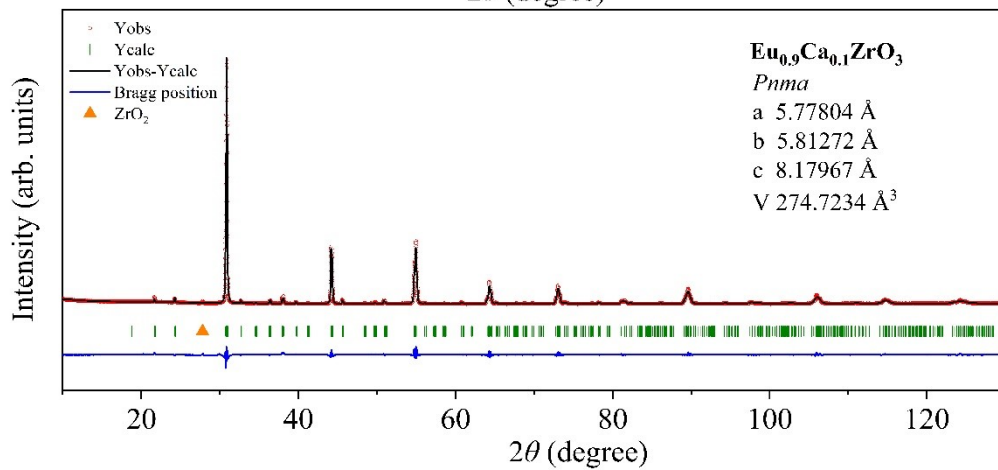

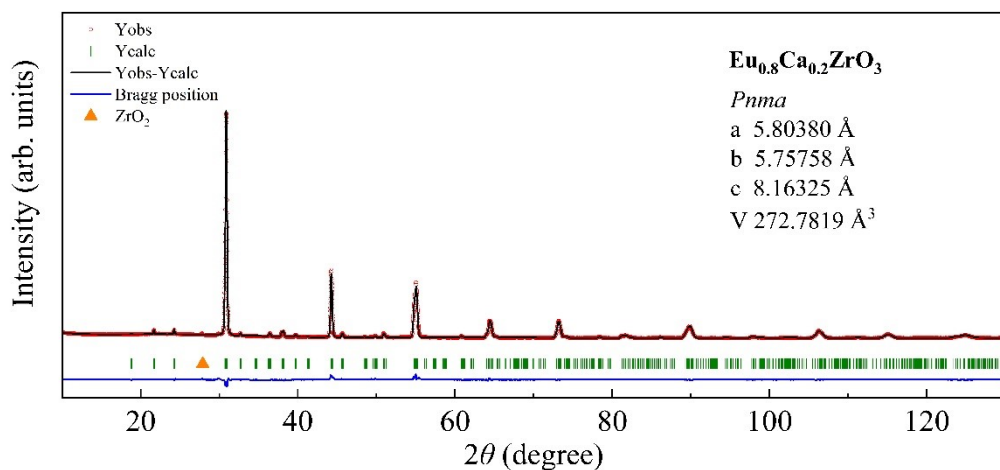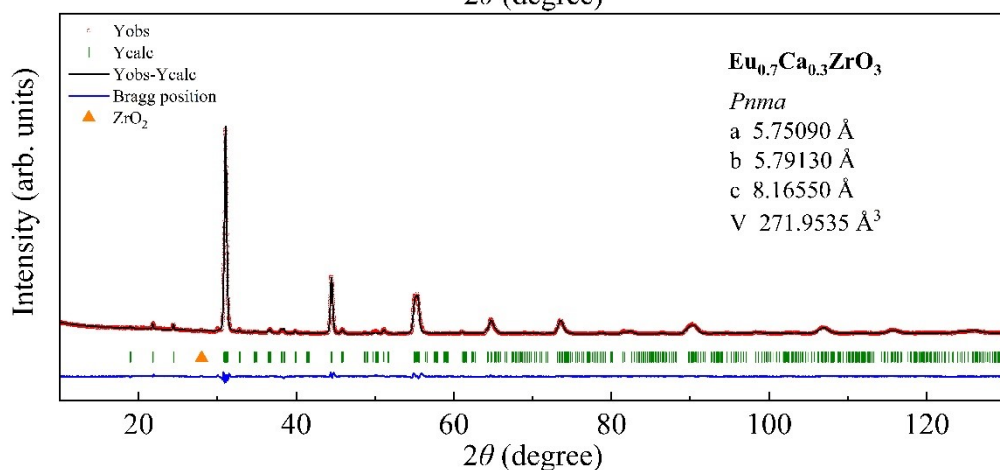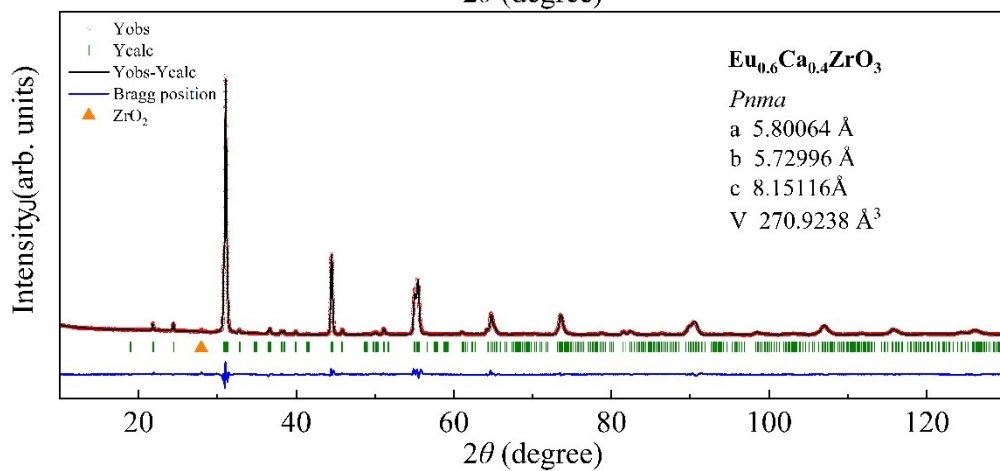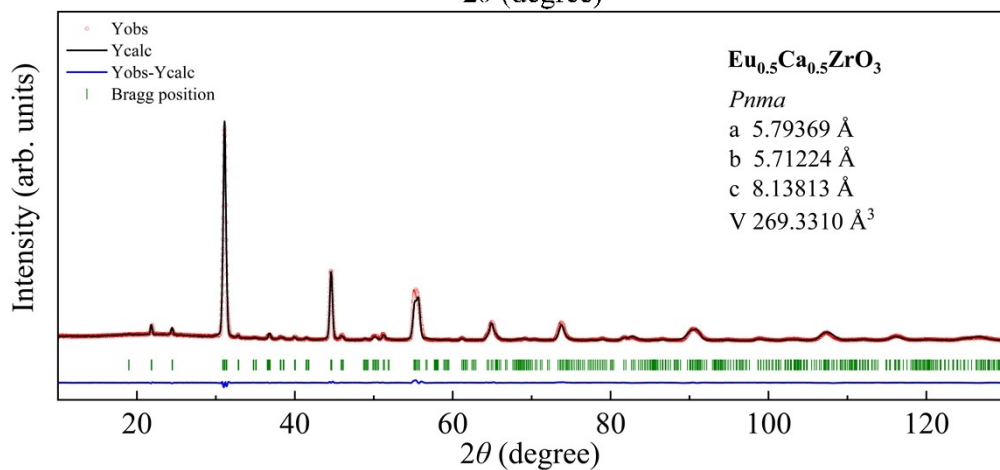

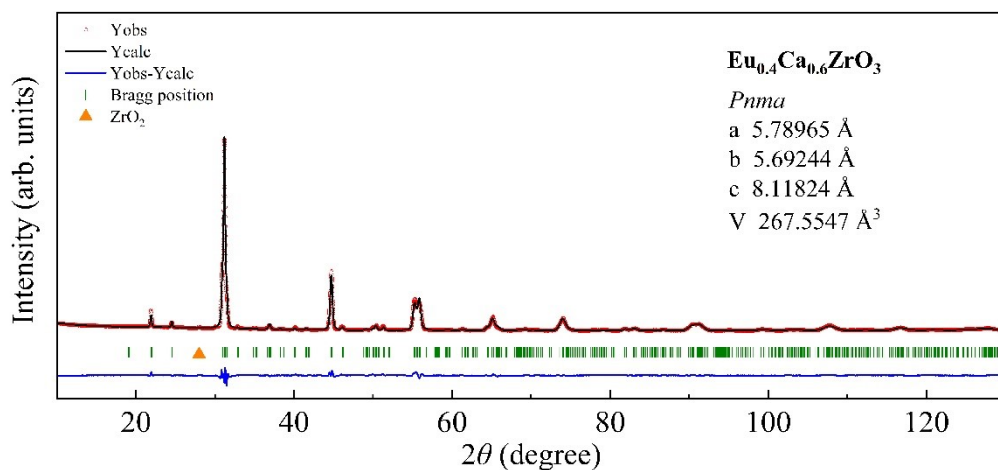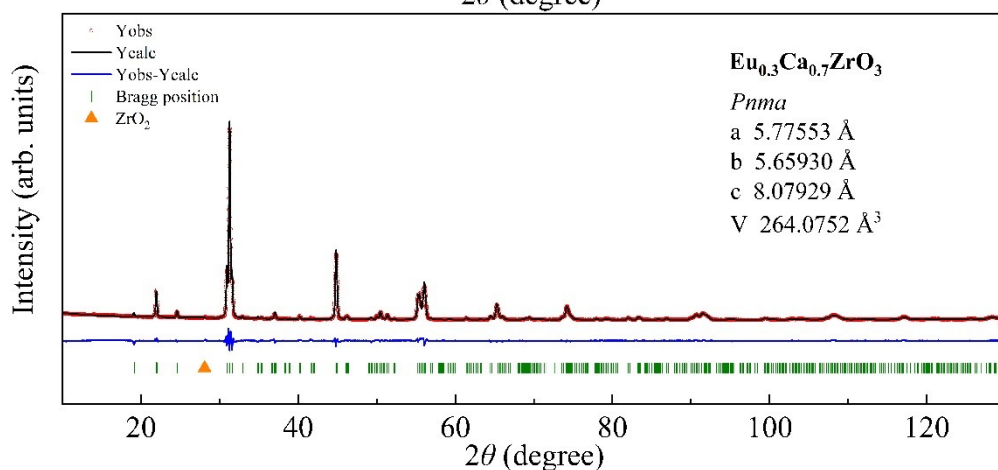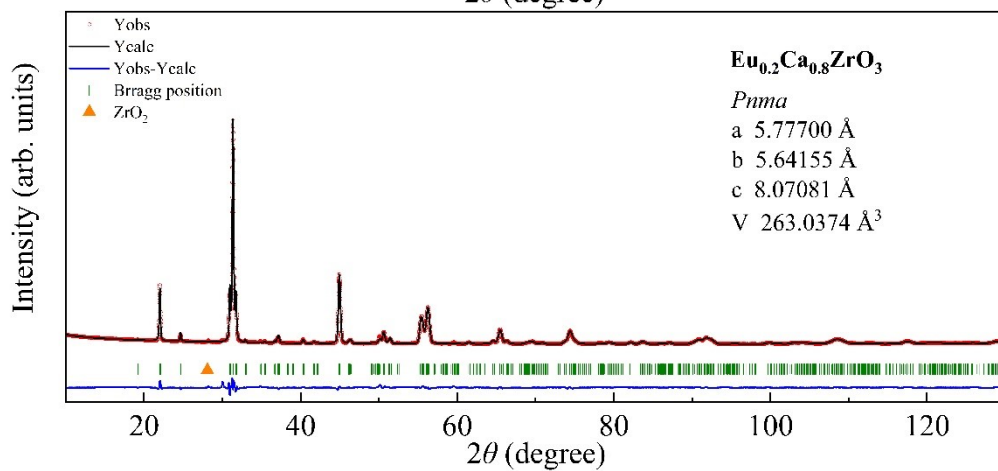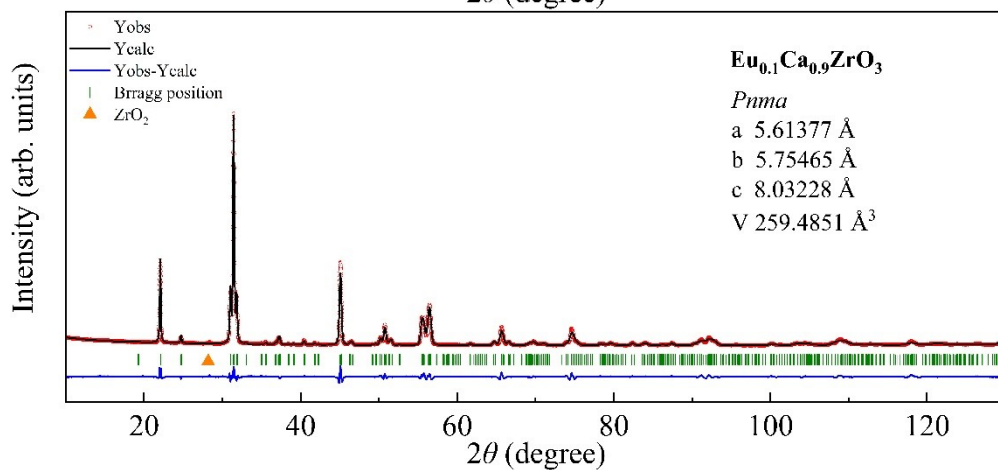

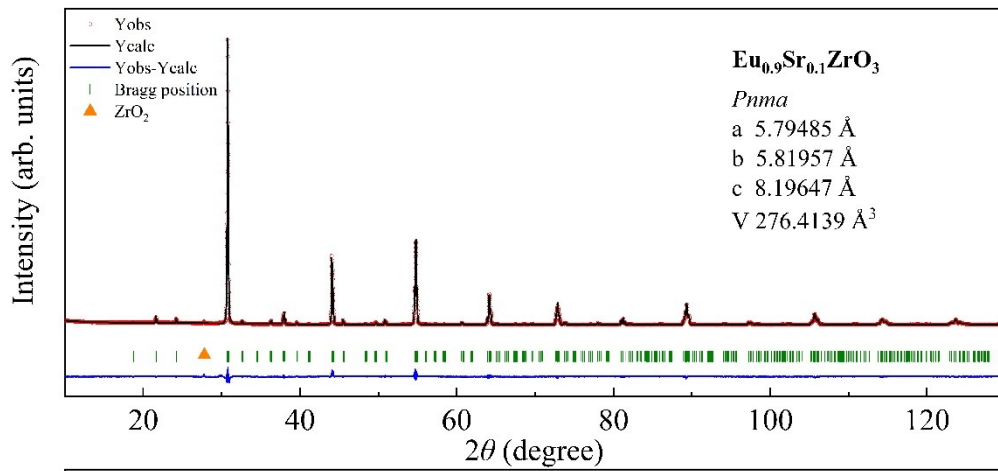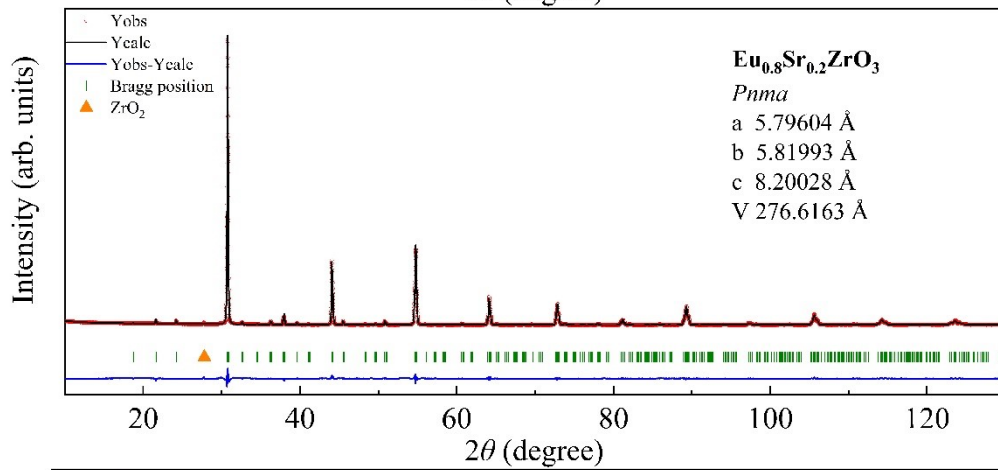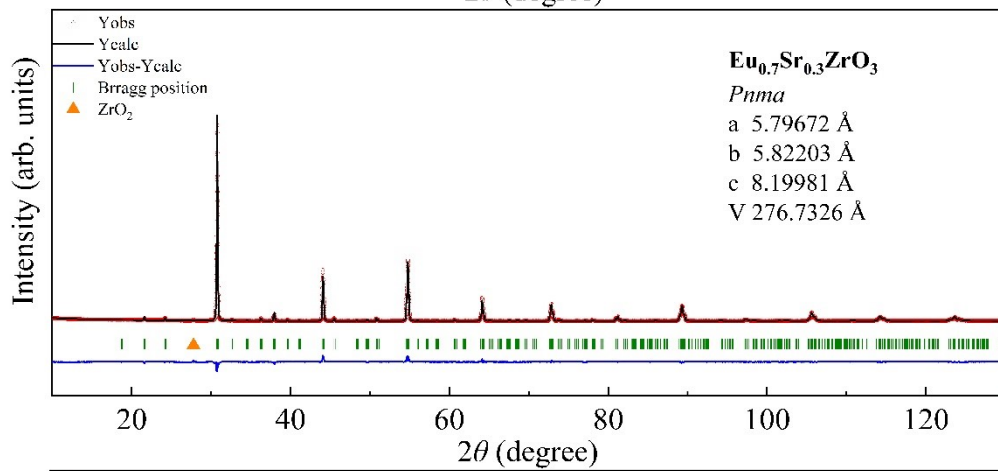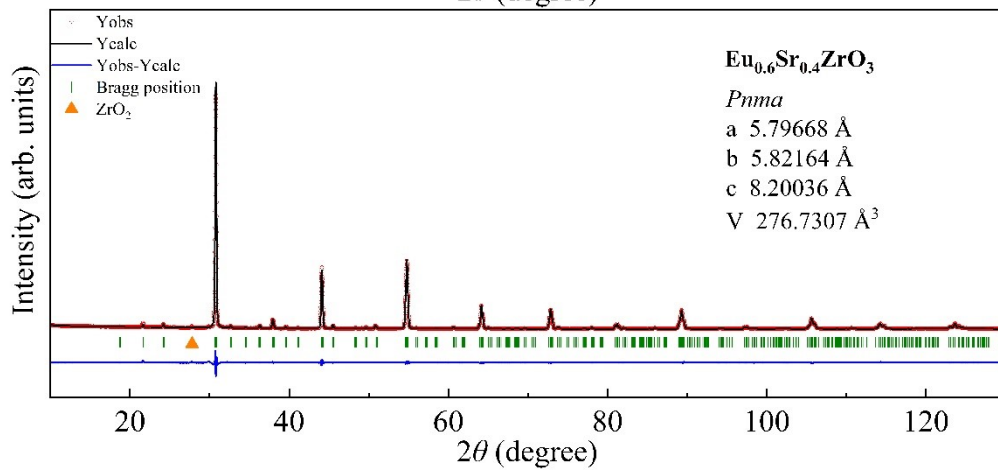



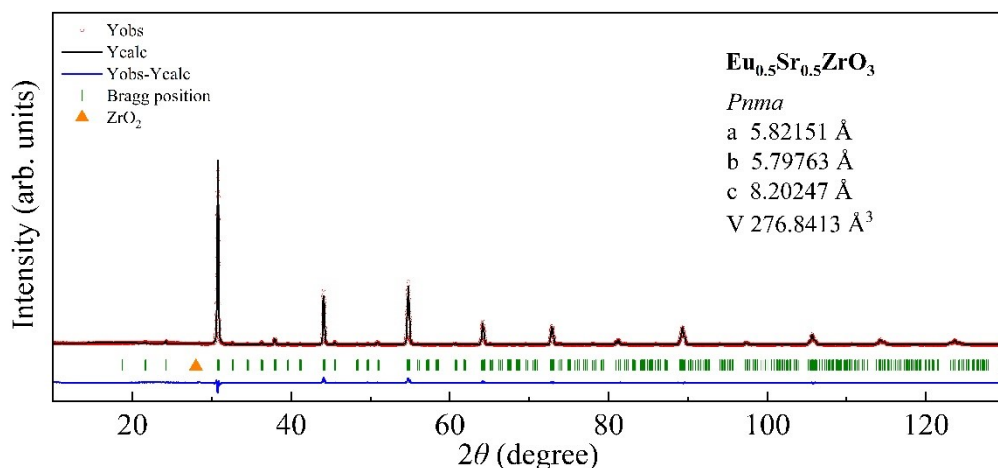

Fig. S1 X-ray diffraction profiles measured at room temperature (red crosses) and calculated profiles obtained by Rietveld analysis (black solid curves) for  $A_x\text{Eu}_{1-x}\text{ZrO}_3$  ( $0 \leq x \leq 1$ ), where A is Ca, Sr, and Ba. The vertical ticks (green) indicate the positions of the Bragg reflections, and the bottom solid lines (blue) correspond to the difference between the observed and the calculated intensity. A small amount of  $\text{ZrO}_2$  was detected as an impurity and marked with an orange triangle for  $\text{EuZrO}_3$ ,  $\text{Ba}_x\text{Eu}_{1-x}\text{ZrO}_3$  ( $0.4 \leq x \leq 0.9$ ),  $\text{Ca}_x\text{Eu}_{1-x}\text{ZrO}_3$  ( $0.1 \leq x \leq 0.4$ ) and ( $0.6 \leq x \leq 0.9$ ), and  $\text{Sr}_x\text{Eu}_{1-x}\text{ZrO}_3$  ( $0.1 \leq x \leq 0.5$ ).

### $^{151}\text{Eu}$ Mössbauer spectrum

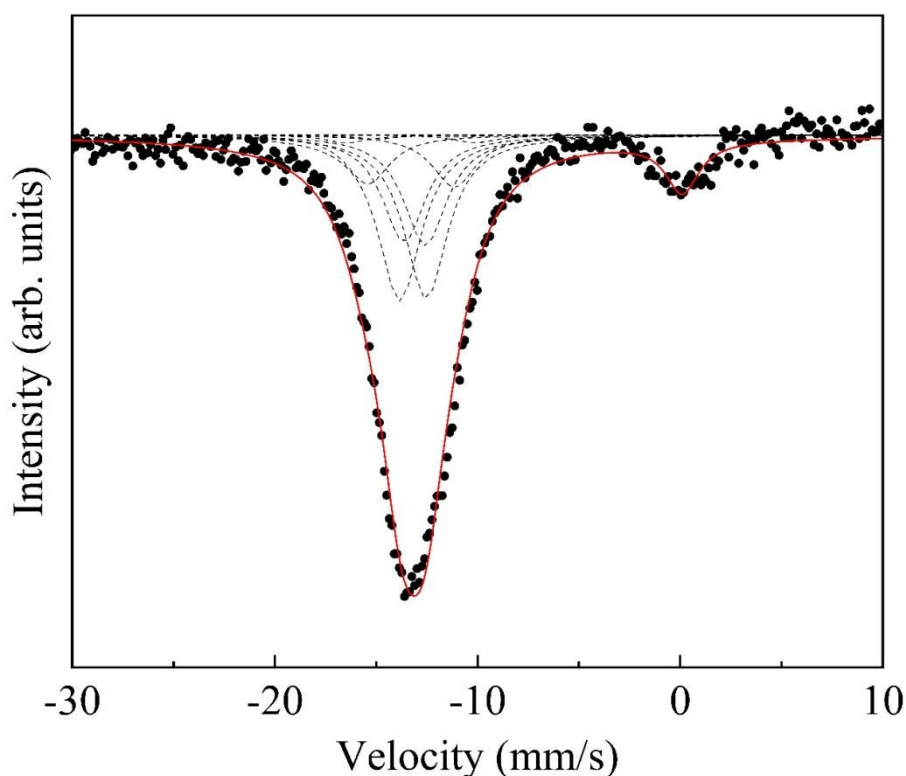

Fig. S2 Room-temperature  $^{151}\text{Eu}$  Mössbauer spectrum of  $\text{EuZrO}_3$  (black solid circles) and theoretical spectrum calculated by taking quadrupole interaction into account (red solid curve). The component lines of the 12 transitions are also shown for the  $\text{Eu}^{2+}$  absorption peak at around 12 mm/s. The  $\text{Eu}^{3+}$  absorption peak at around 0.5 mm/s was analyzed by a single Lorentzian.

Fig. S2 depicts room temperature  $^{151}\text{Eu}$  Mössbauer spectrum of the  $\text{EuZrO}_3$  sample. The spectrum exhibits a strong absorption peak assigned to  $\text{Eu}^{2+}$  at  $-12 \sim -14$  mm/s and a weak absorption peak ascribed to  $\text{Eu}^{3+}$  at  $0 \sim 1$  mm/s. The  $\text{Eu}^{2+}$  absorption peak was fitted using the method described by Shenoy et al since this peak has been analyzed as a pure quadrupole spectral peak<sup>60</sup>. The  $\text{Eu}^{3+}$  absorption peak was

fitted by a single Lorentzian. The fraction of absorption area of  $\text{Eu}^{2+}$  in the total absorption area due to europium ion ( $A_{\text{Eu}^{2+}}/A_{\text{Eu}}$ ), the value of which is 0.94 as shown in Table S1, demonstrates that most of the europium ions are present as divalent state, confirming the efficiency of using ZrN as the reducing agent for the conversion of trivalent europium ions into divalent ones.

Table S1. The fitting parameters for  $^{151}\text{Eu}$  Mössbauer spectrum of  $\text{EuZrO}_3$ .

| $\text{EuZrO}_3$ | $A_{\text{Eu}^{2+}}/A_{\text{Eu}}$ | $\delta$ (mm/s) | $\gamma$ (mm/s) | $eQ_{\text{g}}V_{\text{zz}}$ (mm/s) | $\eta$ (mm/s) |
|------------------|------------------------------------|-----------------|-----------------|-------------------------------------|---------------|
|                  | 0.94                               | -12.96(2)       | 2.41(6)         | -10.20(37)                          | 0.45(6)       |

$A_{\text{Eu}^{2+}}/A_{\text{Eu}}$ : Fraction of absorption area of  $\text{Eu}^{2+}$  in total absorption area due to  $^{151}\text{Eu}$ ,  $\delta$ : isomer shift relative to  $\text{EuF}_3$  as a reference,  $\gamma$ : full width at half maximum of the Lorentzian,  $eQ_{\text{g}}V_{\text{zz}}$ : electric quadrupole interaction parameter, and  $\eta = (V_{\text{xx}} - V_{\text{yy}})/V_{\text{zz}}$  asymmetry parameter, where  $e$  is the elementary charge,  $V_{\sigma\sigma}$  is the electric field gradient in the  $\sigma$  direction and  $Q_{\text{g}}$  is the quadrupole moment of the nucleus in the ground state.

### High-resolution X-ray fluorescence (HRXRF) spectrometry

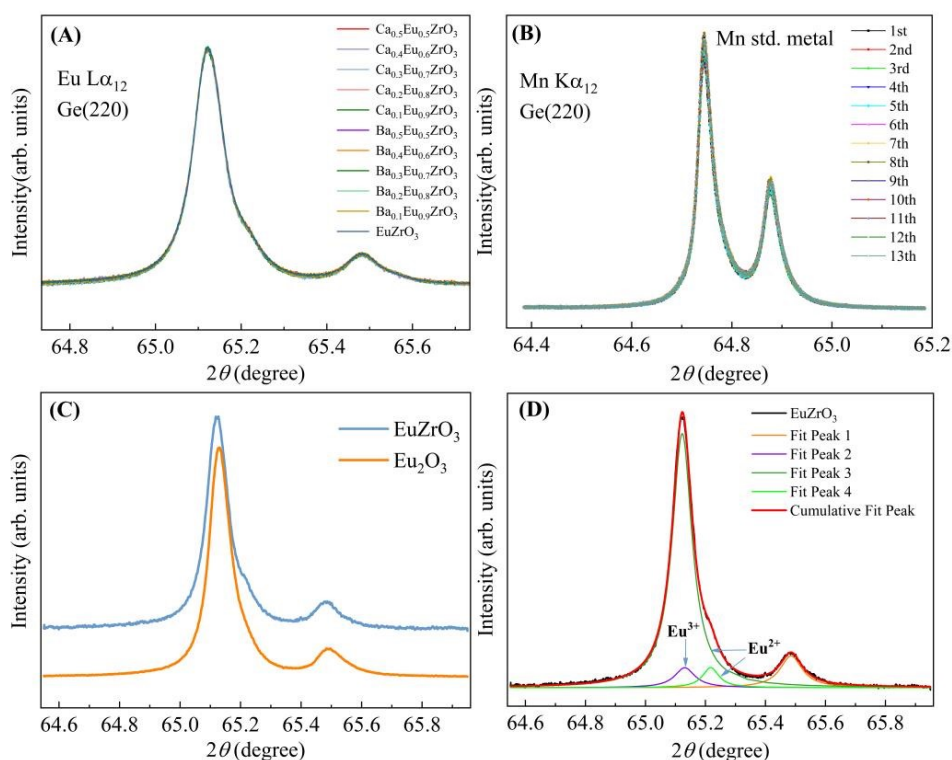

Fig. S3 High-resolution X-ray fluorescence (HRXRF) spectrometry. (a) Measured  $\text{Eu L}_{\alpha 12}$  spectra of  $A_x\text{Eu}_{1-x}\text{ZrO}_3$  ( $0 \leq x \leq 0.5$ ), where  $A$  is  $\text{Ca}$  and  $\text{Ba}$ . The spectra are plotted after smoothing. All the spectra are completely overlapped with each other. (b) Measured  $\text{Mn K}_{\alpha 12}$  spectra of  $\text{Mn}$  metal as the standard before and after testing  $\text{Eu L}_{\alpha 12}$  spectra of  $A_x\text{Eu}_{1-x}\text{ZrO}_3$  and  $\text{Eu}_2\text{O}_3$ . (c) Measured  $\text{Eu L}_{\alpha 12}$  spectra of  $\text{EuZrO}_3$  and  $\text{Eu}_2\text{O}_3$ . (d) Measured  $\text{Eu L}_{\alpha 12}$  spectra of  $\text{EuZrO}_3$  (black curve) and fitted spectra (red curve) by Lorentzians. The Lorentzian peaks are displayed by different colors.

As shown in Fig. S3a, the spectra for all  $A_x\text{Eu}_{1-x}\text{ZrO}_3$  samples have almost the same peak positions and intensities and are completely overlapped with each other. The  $\text{Mn K}_{\alpha 12}$  standard spectra were shown in Fig. S3b for each sample. Compared to the  $\text{Eu L}_{\alpha 12}$  spectral peak of  $\text{EuZrO}_3$  at  $65.12^\circ$ , the peak position for  $\text{Eu}_2\text{O}_3$  at  $65.13^\circ$  is slightly different (Fig. S3c). Additionally, the  $\text{Eu L}_{\alpha 12}$  spectrum of  $\text{EuZrO}_3$  displays a distinct shoulder at around  $65.2^\circ$ . Since the presence of trivalent  $\text{Eu}$  ions in  $\text{EuZrO}_3$  is confirmed by  $^{151}\text{Eu}$  Mössbauer spectrum, the main peak on the left is divided into three sub-peaks. The peak on the right in the  $\text{Eu L}_{\alpha 12}$  spectra of  $\text{Eu}_2\text{O}_3$  and  $\text{EuZrO}_3$  is found to have the same position at around  $65.5^\circ$ . To analyze the valence states of  $\text{Eu}$  in  $\text{EuZrO}_3$ , the  $\text{Eu L}_{\alpha 12}$  spectrum is deconvoluted into four Lorentzians (Fig. S3d). The parameters obtained by the fitting are listed in Table S2. The coefficient of determination



( $R^2$ ) value of 0.999 indicates the accuracy of the fitting method. Especially, the FWHM and peak position of peak 2 are consistent with the left main peak in the Eu  $L_{\alpha 12}$  spectrum of  $\text{Eu}_2\text{O}_3$  (trivalent Eu ions), revealing that the result is convincing. Since peak 3 and peak 4 attributed to divalent Eu ions form the left main peak combined with peak 2 in the Eu  $L_{\alpha 12}$  spectrum of  $\text{EuZrO}_3$ , the value of peak 2 area divided by the total area of three peaks represents the molar ratio of trivalent Eu ions. The value is consistent with that obtained from the  $^{151}\text{Eu}$  Mössbauer spectrum (6%). The presence of approximately 6% trivalent Eu ions in all  $\text{A}_x\text{Eu}_{1-x}\text{ZrO}_3$  samples is confirmed by HRXRF spectra with high consistency.

Table S2. The peak position ( $2\theta$ ), peak area ( $A$ ), and full width at half maximum (FWHM) of Lorentzian peaks used for the analysis of the measured spectrum of  $\text{EuZrO}_3$ .

| $\text{EuZrO}_3$ | $2\theta$ (degree) | $A$     | FWHM   |
|------------------|--------------------|---------|--------|
| Peak 1           | 65.4856            | 5.4258  | 0.0891 |
| Peak 2           | 65.1311            | 2.9863  | 0.0819 |
| Peak 3           | 65.1224            | 41.6294 | 0.0808 |
| Peak 4           | 65.2176            | 2.7176  | 0.0659 |

### Magnetic properties

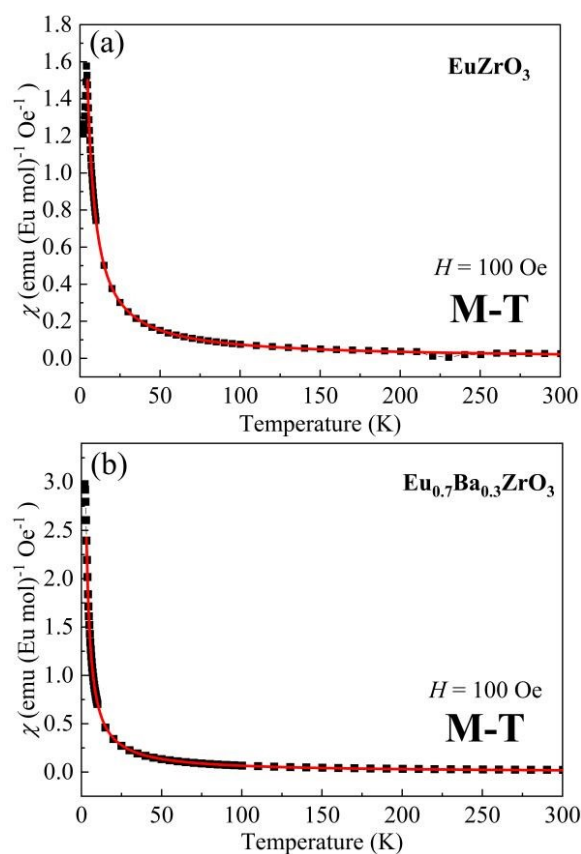

Fig. S4 Temperature dependence of magnetic susceptibility  $\chi(T)$  for (a)  $\text{EuZrO}_3$  and (b)  $\text{Ba}_{0.3}\text{Eu}_{0.7}\text{ZrO}_3$  solid solution. Black squares represent the measured data. Red curves denote theoretical curves.

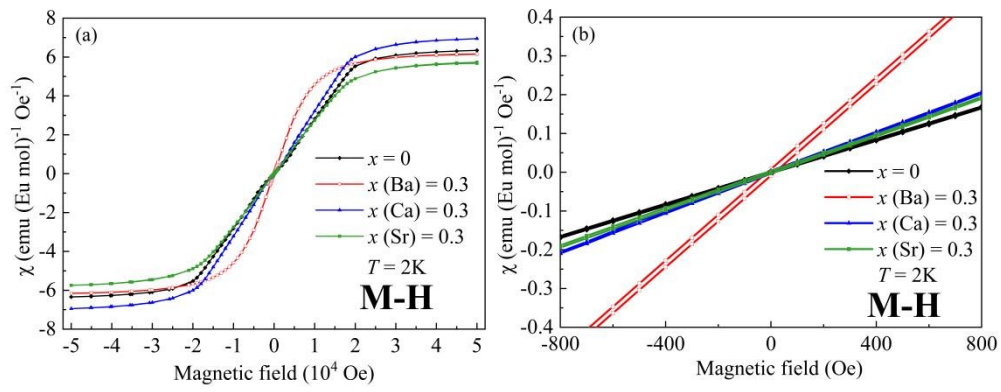

Fig. S5 Dependence of magnetic susceptibility on magnetic field at 2 K for (a)  $\text{EuZrO}_3$  and  $\text{A}_{0.3}\text{Eu}_{0.7}\text{ZrO}_3$  with  $\text{A} = \text{Ba, Ca, and Sr}$ . (b) Magnified view of (a).
